# Supplementary material for: Potential of catalytic oxidation of kraft black liquor for the production of biosourced compounds
Source: Royal Society of Chemistry journal article supplement (doi:10.1039/d3gc00388d), 2023-01-01
Supplement: d3gc00388d1.pdf [file d3gc00388d1.pdf]

## Potential of catalytic oxidation of Kraft black liquor for the production of biosourced compounds

Léa Vilcocq,<sup>\*a</sup> Nicolas Chaussard,<sup>a,b</sup> Antonio Hernández Mañas,<sup>a,b</sup> Olivier Boyron,<sup>a</sup> Manel Taam,<sup>a</sup> Frédérique Bertaud,<sup>c</sup> Pascal Fongarland,<sup>a</sup> and Laurent Djakovitch<sup>\*b</sup>

### Electronic Supplementary Information

|                                                                                                            |    |
|------------------------------------------------------------------------------------------------------------|----|
| 1. Catalyst preparation and characterization.....                                                          | 2  |
| 2. FTIR spectra of Kraft black liquor (KBL), Kraft lignin (KL) and Klason phases (KP) .....                | 3  |
| 3. HPLC analysis of KBL before reaction .....                                                              | 5  |
| 4. NMR HSQC and <sup>1</sup> H of Kraft black liquor (KBL), Kraft lignin (KL) and Klason phases (KP) ..... | 6  |
| 5. Carbon balance during catalytic oxidation of KBL.....                                                   | 10 |
| 6. Repeatability test on catalytic oxidation of KBL (batch mode) .....                                     | 11 |
| 7. Deactivation of the catalyst CuO/TiO <sub>2</sub> (continuous mode).....                                | 12 |
| 8. Productivity of various compounds.....                                                                  | 13 |

## 1. Catalyst preparation and characterization

**Catalyst preparation.** 5%CuO/TiO<sub>2</sub> was synthesized in our group by incipient wetness impregnation employing a copper nitrate as precursor (Cu(NO<sub>3</sub>)<sub>2</sub>·2.5H<sub>2</sub>O) in aqueous solution. The catalyst was kept under stirring 4 hours after the impregnation, and then dried at 110°C for one night and calcined at 550°C for 5 hours. Such method showed a good repeatability in the metal charge from one catalyst batch to another (4.9-5%wt).

**Chemical analysis (ICP-OES)** was carried out by using ICP-OES ACTIVA Jobin Yvon device. Before analysis, mineralization was carried out by a dilution with H<sub>2</sub>SO<sub>4</sub>, HNO<sub>3</sub> and HF, a subsequent evaporation and then heating process of the residue with HNO<sub>3</sub>.

**Physisorption N<sub>2</sub>.** The porosimetry and BET analysis were carried out on an ASAP 2020 of Micromeritics, equipped with two pressure sensors. The analysis were done using nitrogen as physisorption gas at a temperature of -196°C. Desorption pre-treatment was carried out for 3 h at 300°C under vacuum.

**X-ray diffraction** analysis was carried out in a Bruker D8-Advance with automatic sampler, using a radiation Cu-K $\alpha$  (0.154184nm).

Table S1. Characterization of CuO/TiO<sub>2</sub> (5%wt Cu)

| Analysis                           | Parameter           | Result                                                      |
|------------------------------------|---------------------|-------------------------------------------------------------|
| ICP                                | Cu charge           | 4.9-5 wt.%<br>Homogeneous loading                           |
| N <sub>2</sub> Physisorption - BET | Specific surface    | 32 $\pm$ 1 m <sup>2</sup> .g <sup>-1</sup>                  |
| N <sub>2</sub> Physisorption - BJH | Porosity            | Mesopores (2-50 nm)<br>Av. Size: 25 nm                      |
| XRD                                | Phases distribution | TiO <sub>2</sub> Anatase and Rutile<br>CuO Tenorite (minor) |

The catalyst specific surface area was rather low (32 m<sup>2</sup>.g<sup>-1</sup>). The pores presented an average diameter of 25 nm. The crystalline phases observed by XRD corresponded to the ones of the commercial TiO<sub>2</sub> support, with minor signal corresponding to CuO crystallites.

## 2. FTIR spectra of Kraft black liquor (KBL), Kraft lignin (KL) and Klason phases (KP)

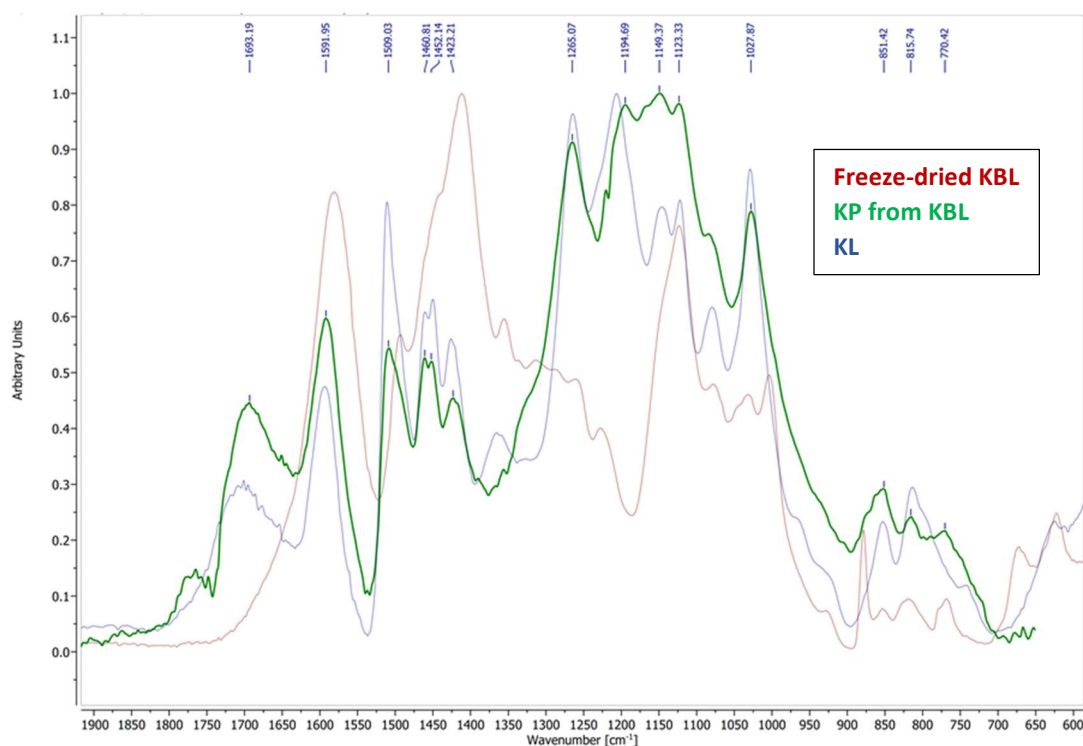

**Figure S1.** FTIR spectra of starting materials. KBL after freeze-drying (red), KP extracted from KBL (green) and KL.

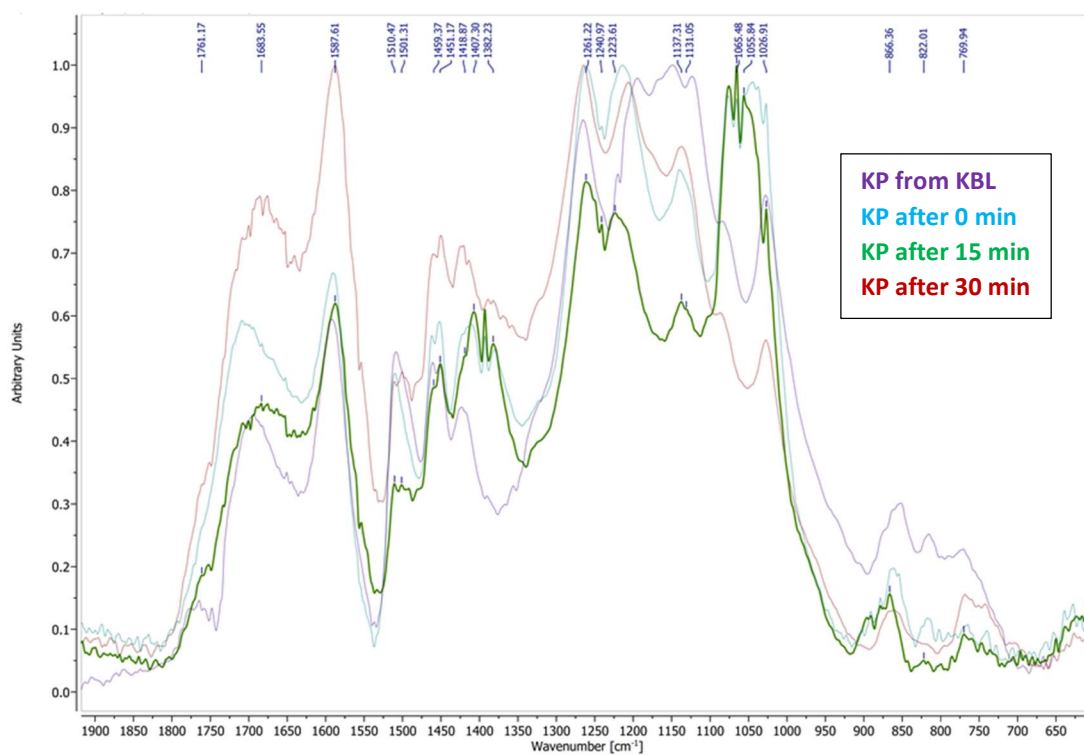

**Figure S2.** FTIR spectra of Klason phases after non-catalytic oxidation reactions, in batch mode, 150°C, 20 bar.

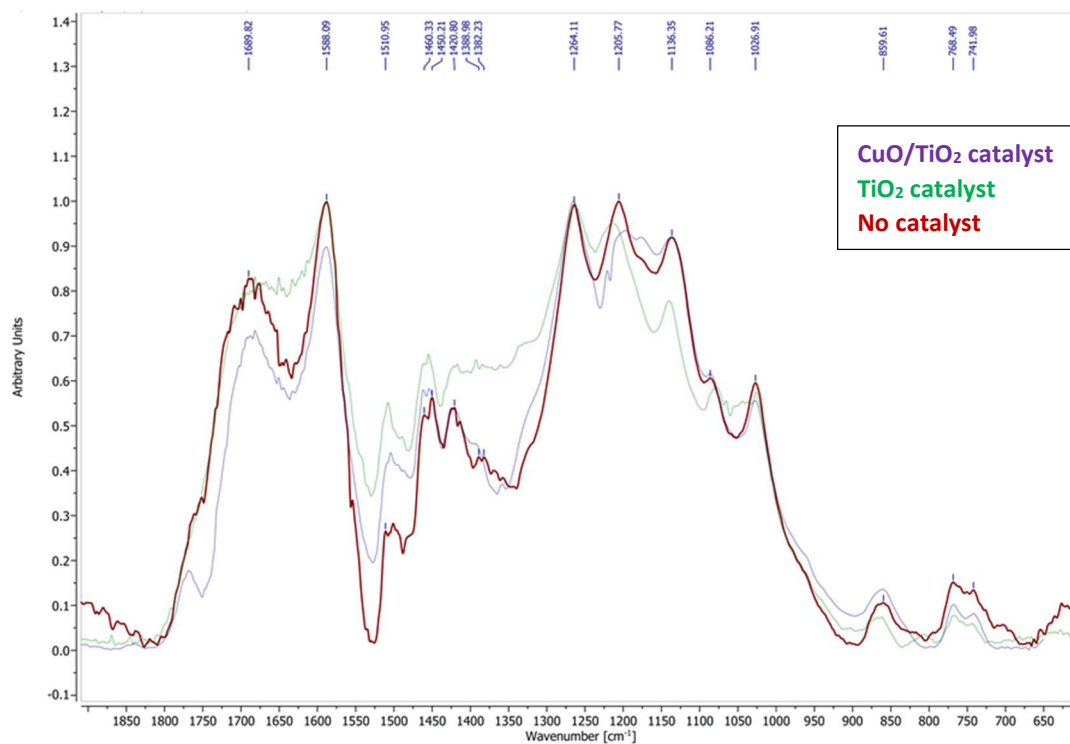

**Figure S3.** FTIR spectra of Klason phases after non-catalytic / catalytic oxidation reactions, in batch mode, 150°C, 20 bar, 30 min.

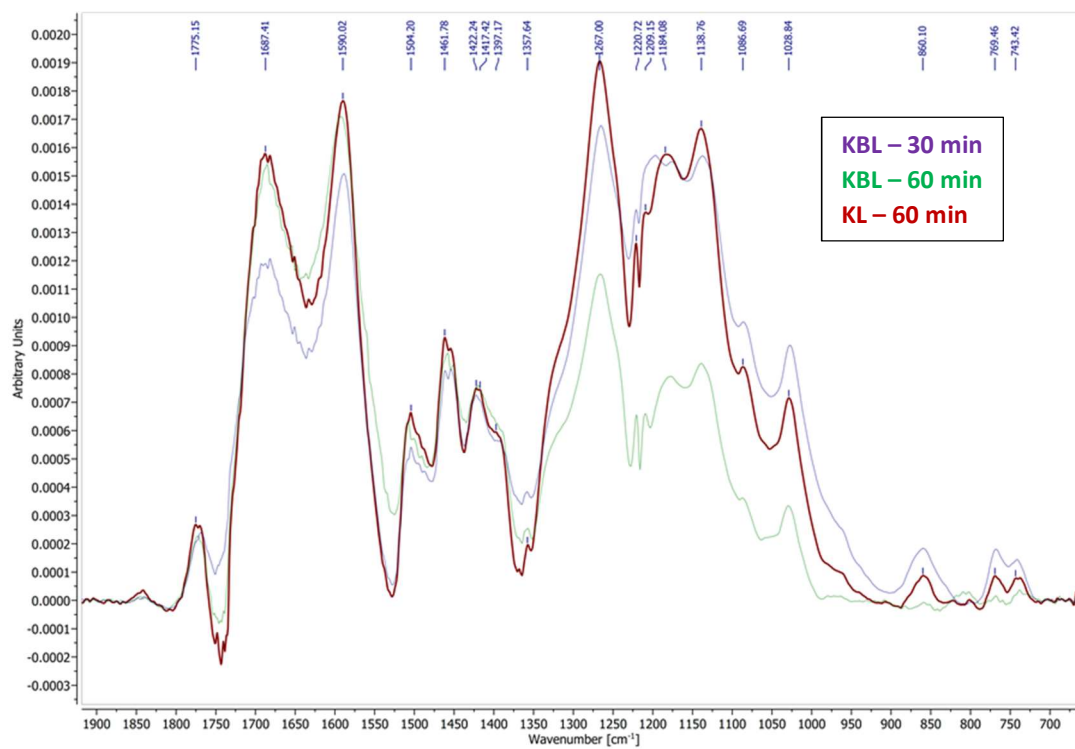

**Figure S4.** FTIR spectra of Klason phases after catalytic oxidation reactions, in batch mode, 150°C, 20 bar, catalyst CuO/TiO<sub>2</sub>, starting material KBL or KL.

### 3. HPLC analysis of KBL before reaction

**Table S2.** Concentration of aliphatic and phenolic compounds measured in HPLC in raw KBL (in gC.L<sup>-1</sup>). *n.d.*: not detected.

| Compound                | Raw KBL, not diluted (26 % dry matter) |
|-------------------------|----------------------------------------|
| Oxalic acid             | 0.095                                  |
| Tartronic acid          | 1.943                                  |
| Glyceric acid           | 0.118                                  |
| Glycolic acid           | 1.308                                  |
| Formic acid             | 2.547                                  |
| Malic acid              | n.d.                                   |
| Malonic acid            | n.d.                                   |
| 3-hydroxypropionic acid | 1.047                                  |
| Lactic acid             | 1.833                                  |
| Maleic acid             | n.d.                                   |
| Acetic acid             | 2.705                                  |
| Fumaric acid            | n.d.                                   |
| Succinic acid           | 0.189                                  |
| 2-hydroxybutyric acid   | 0.614                                  |
| Gallic acid             | traces                                 |
| HMF                     | traces                                 |
| Furfural                | traces                                 |
| Catechol                | n.d.                                   |
| p-Benzoquinone          | 0.110                                  |
| Protocatechuic acid     | 0.022                                  |
| 4-Hydroxybenzoic acid   | n.d.                                   |
| Phthalic acid           | 0.788                                  |
| Vanillic acid           | n.d.                                   |
| Homovanillic acid       | 0.364                                  |
| m-Anisic acid           | n.d.                                   |
| Syringic acid           | n.d.                                   |
| Phenol                  | 0.214                                  |
| 4-Hydroxyacetophenone   | n.d.                                   |
| Vanillin                | 0.129                                  |
| Syringaldehyde          | n.d.                                   |
| Acetovanillone          | n.d.                                   |
| Acetosyringone          | n.d.                                   |
| Ferulic acid            | n.d.                                   |
| Guaiacol                | 0.247                                  |
| Benzoic acid            | 0.146                                  |
| 4-Hydroxybenzaldehyde   | 0.114                                  |

#### 4. NMR HSQC and $^1\text{H}$ of Kraft black liquor (KBL), Kraft lignin (KL) and Klason phases (KP)

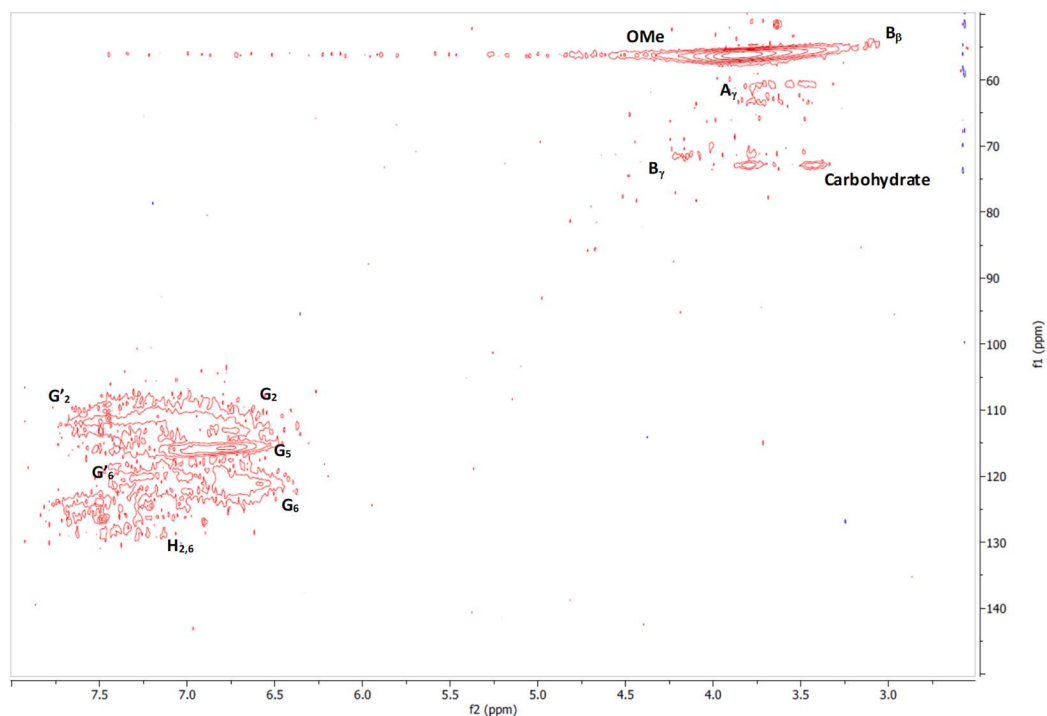

**Figure S5.** HSQC spectra of the initial KBL, freeze-dried. Please note the absence of correlations corresponding to inter-unit bonds.

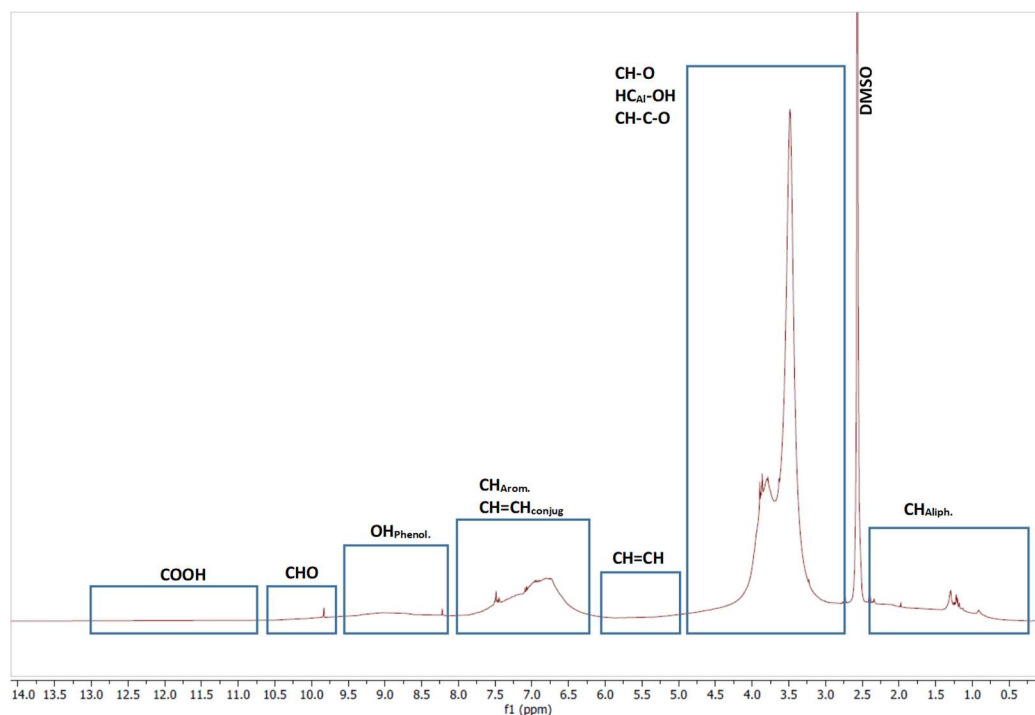

**Figure S6.**  $^1\text{H}$  NMR spectra of KBL as obtained from freeze-dried black liquor.

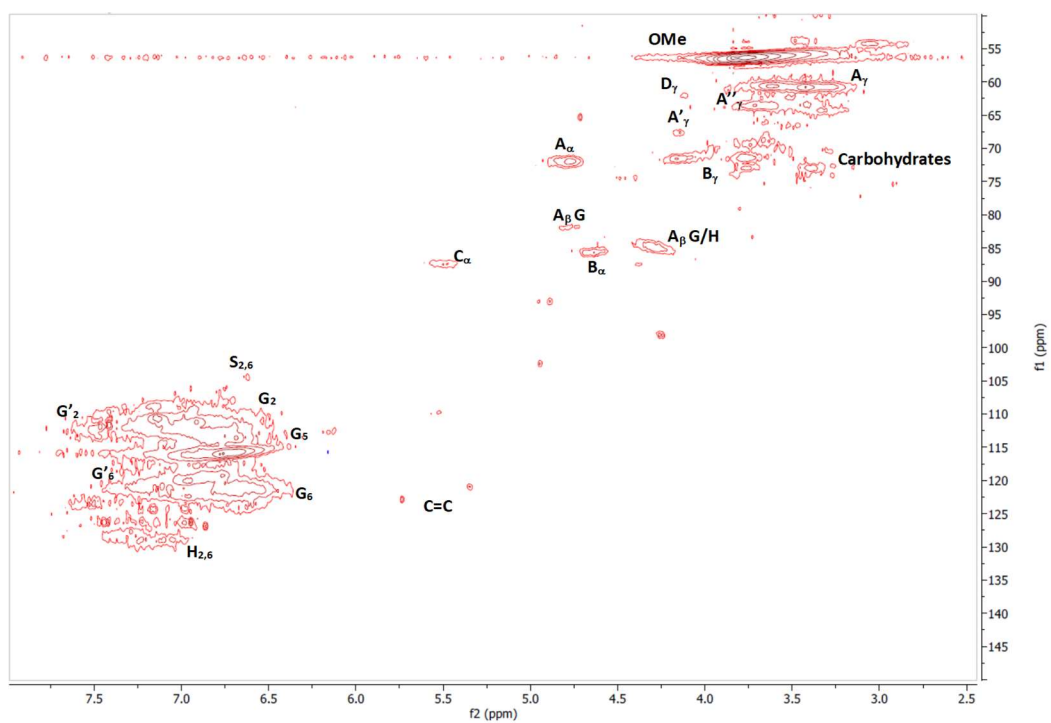

**Figure S7.** HSQC spectra of the initial KL.

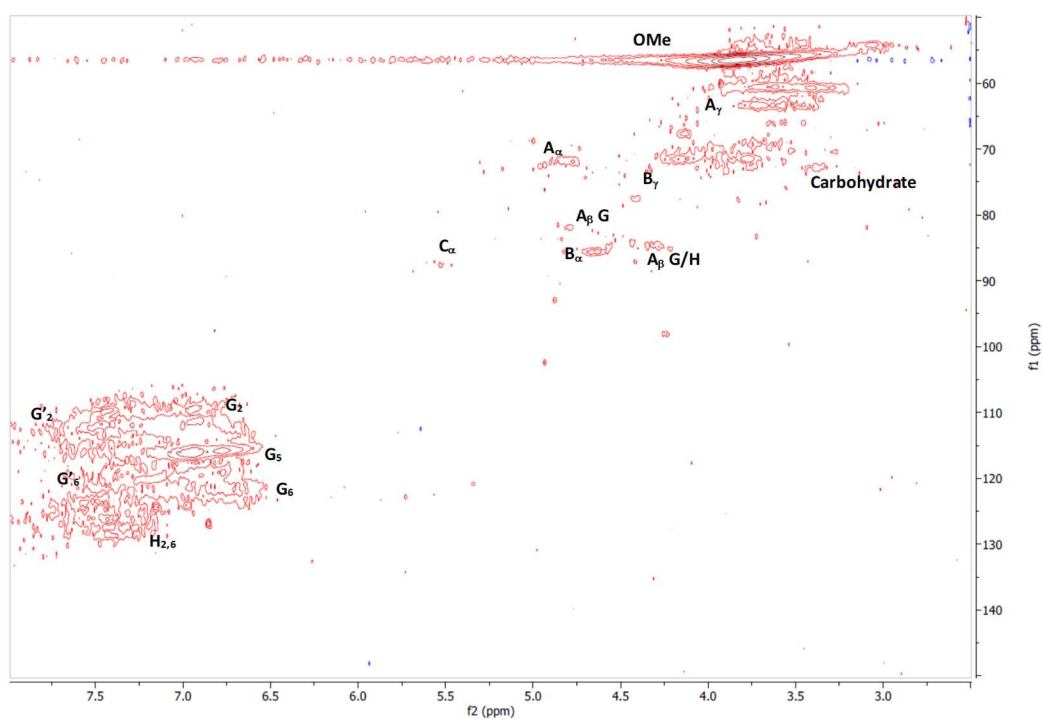

**Figure S8.** HSQC spectra of KP after 0 min of non catalytic oxidation of KBL in batch mode, 150°C, 20 bar.

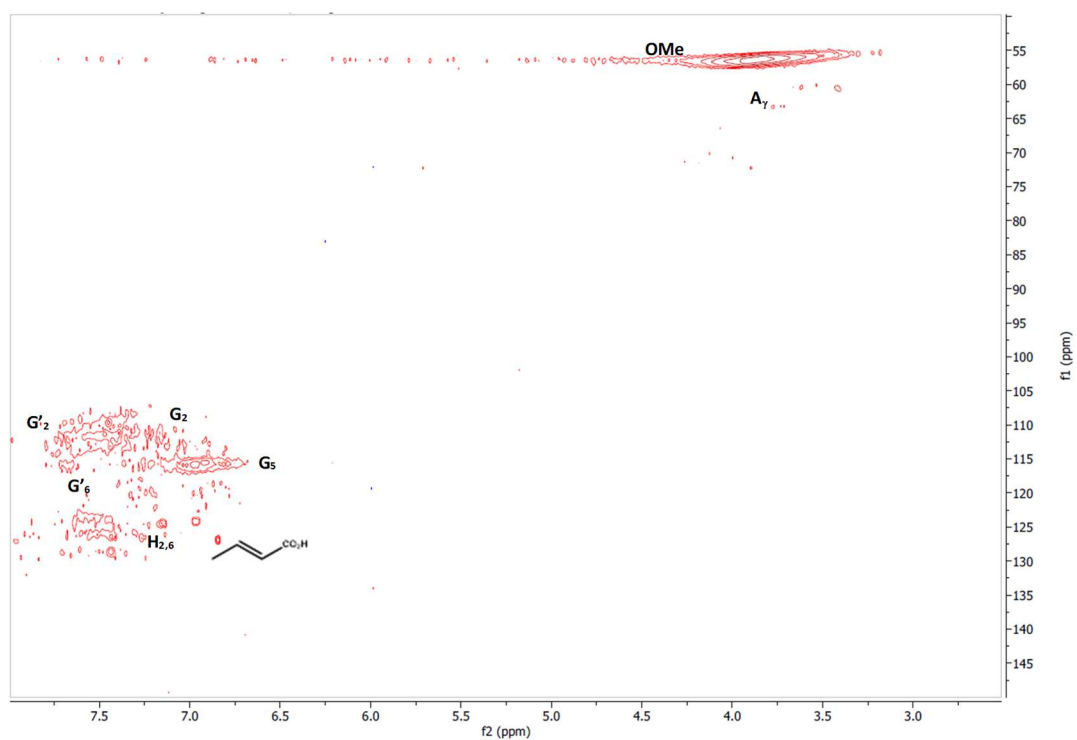

**Figure S9.** HSQC spectra of KP after 15 min of non catalytic oxidation of KBL in batch mode, 150°C, 20 bar.

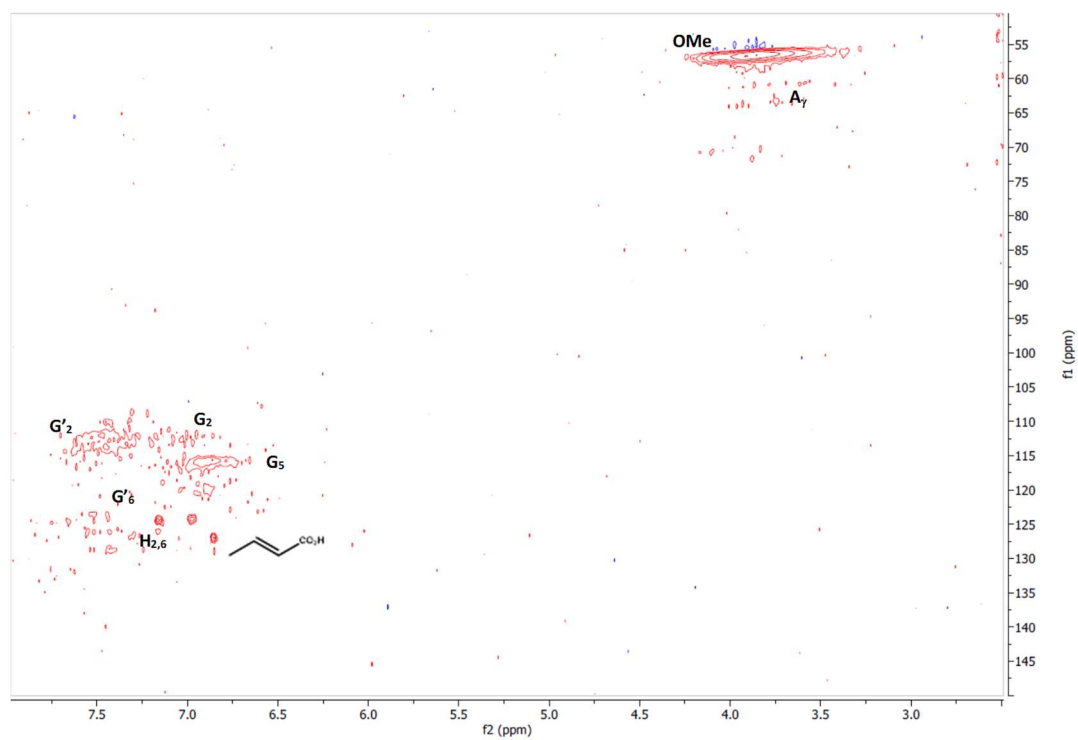

**Figure S10.** HSQC spectra of KP after 30 min of non catalytic oxidation of KBL in batch mode, 150°C, 20 bar.



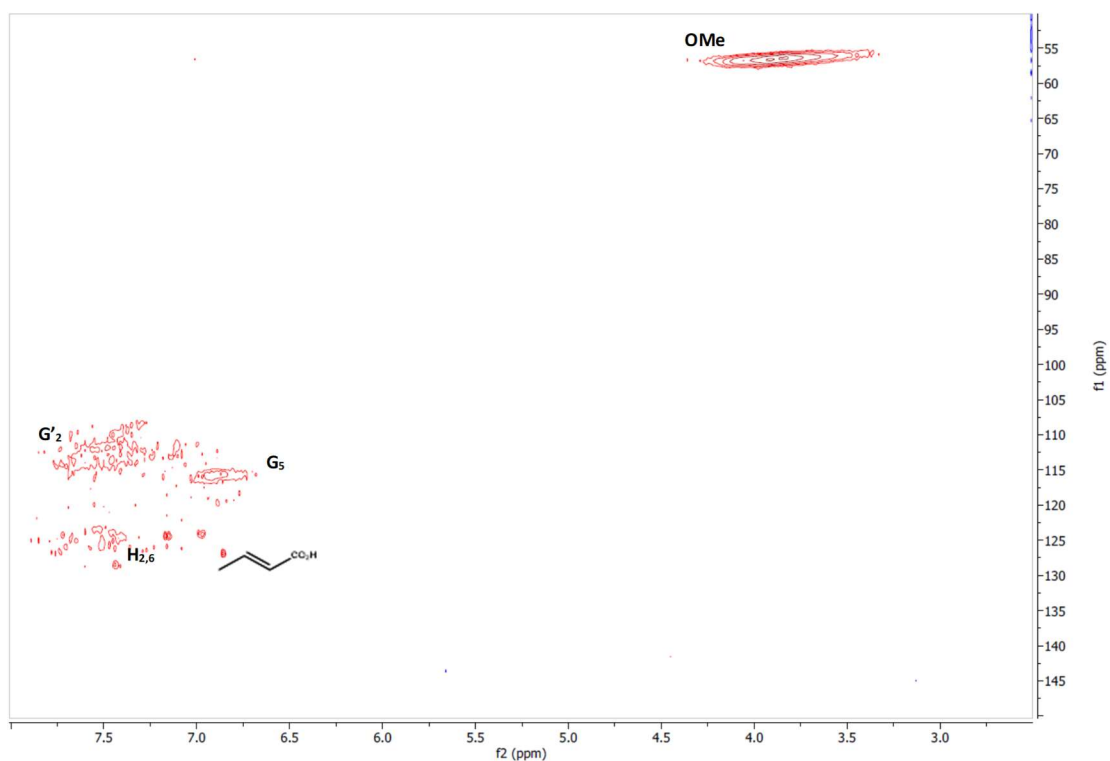

**Figure S11.** HSQC spectra of KP after 30 min of catalytic oxidation of KBL in batch mode, 150°C, 20 bar, catalyst CuO/TiO<sub>2</sub>.

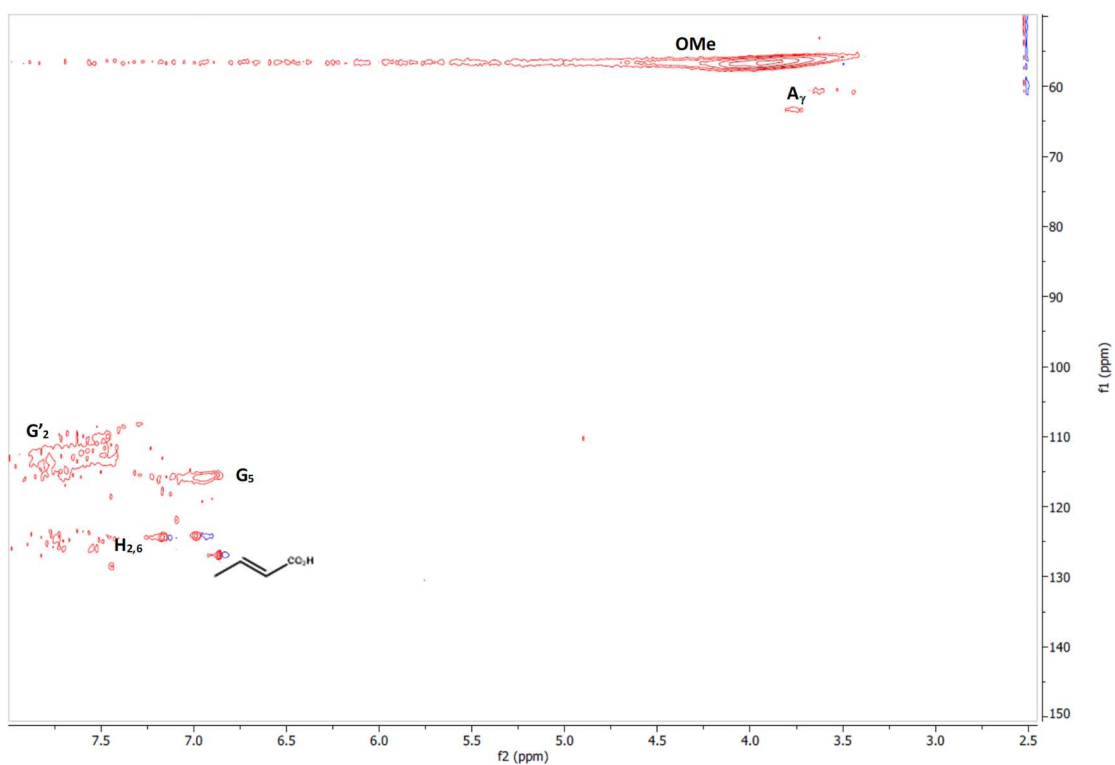

**Figure S12.** HSQC spectra of KP after 30 min of catalytic oxidation of KL in batch mode, 150°C, 20 bar, catalyst CuO/TiO<sub>2</sub>.

## 5. Carbon balance during catalytic oxidation of KBL

Total organic carbon was measured after KBL oxidation with a copper catalyst. Results are presented in Figure S133.

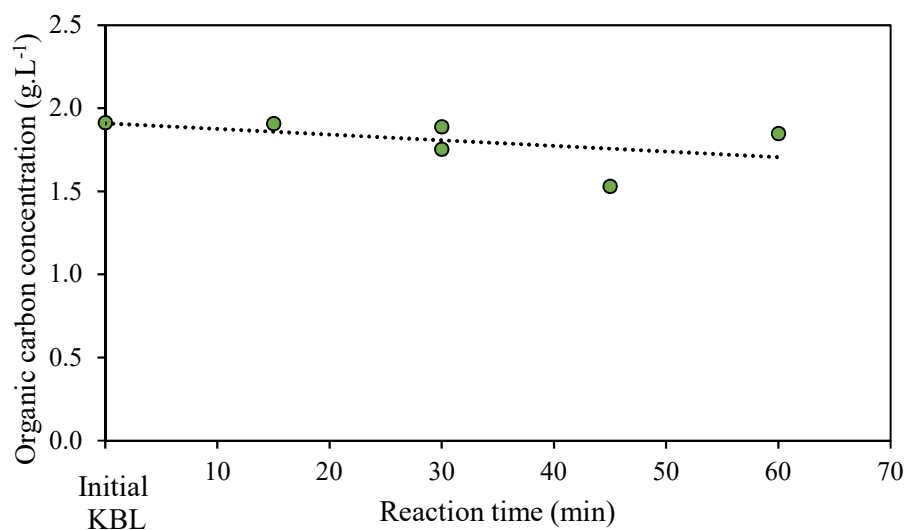

**Figure S13.** Carbon concentration in liquid phase during KBL oxidation (150°C, 20 bar, batch mode).

## 6. Repeatability test on catalytic oxidation of KBL (batch mode)

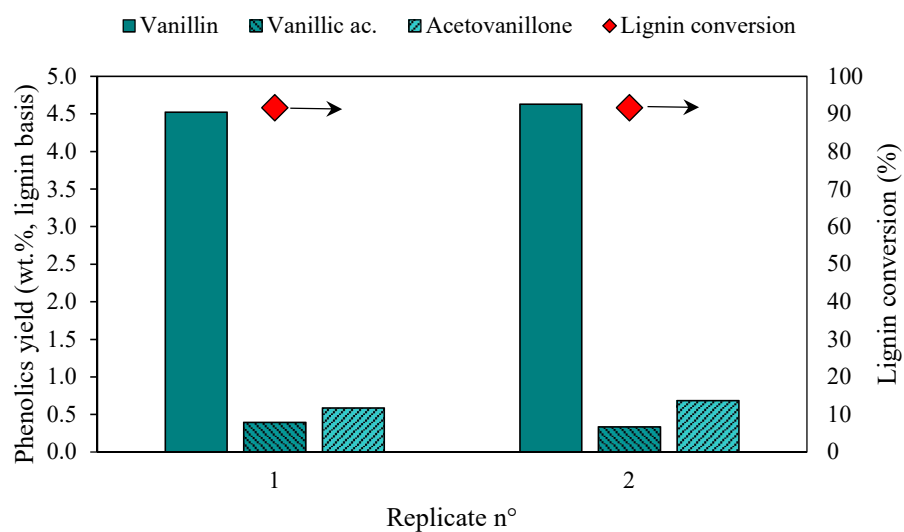

**Figure S14.** Repeatability of the catalytic oxidation of KBL in batch mode. *Operating conditions: 150°C, 20 bar air, stirring 1800 rpm, 30 min, dry matter concentration 5 g.L<sup>-1</sup>, copper/lignin mass ratio 5 %.*

## 7. Deactivation of the catalyst CuO/TiO<sub>2</sub> (continuous mode)

Figure S15 shows the performances of CuO/TiO<sub>2</sub> catalyst during KBL oxidation in continuous reactor, at 200°C. An absence of deactivation was observed during 2 h on stream.

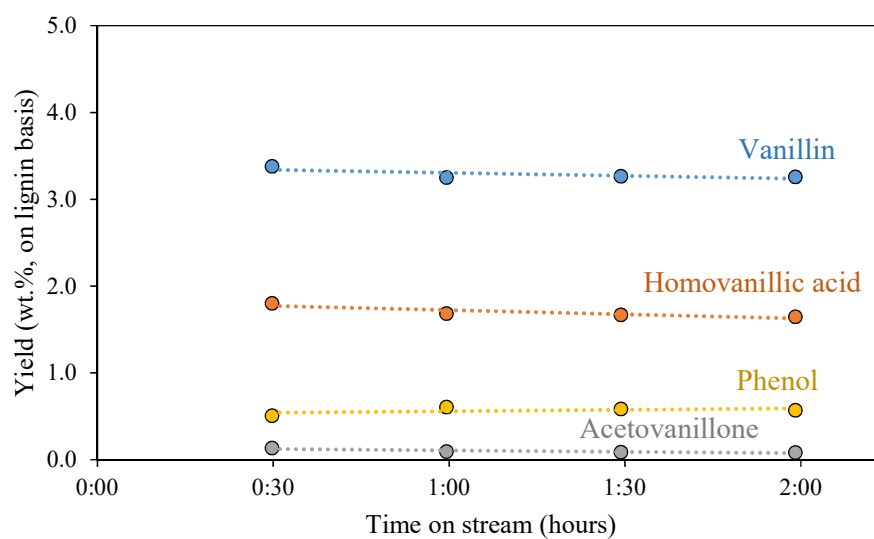

**Figure S15.** Yields of phenolic compounds during the catalytic oxidation of KBL. Operating conditions: 200°C, 80 bar, contact time 3.9 min, dry matter concentration 5 g.L<sup>-1</sup>, catalyst CuO/TiO<sub>2</sub>.

## 8. Productivity of various compounds

**Table S3.** Values calculated for the productivity of various compounds in various operating conditions (in kg.h<sup>-1</sup>.m<sup>-3</sup>).

| Starting material | Catalyst             | Reaction time (min) | Reactor type | Klason phase (lignin) | Vanillin      | Phenol | Phenolic mix | Formic acid | Acetic acid | Tartronic acid | Succinic acid | Aliphatic acids mix without volatiles |
|-------------------|----------------------|---------------------|--------------|-----------------------|---------------|--------|--------------|-------------|-------------|----------------|---------------|---------------------------------------|
| <b>KL</b>         | CuO/TiO <sub>2</sub> | 30                  | Batch        | 0.293                 | <i>0.0884</i> | 0.055  | <b>0.22</b>  | 1.048       | 0.191       | 0.000          | 0.593         | <b>1.30</b>                           |
| <b>KBL</b>        | CuO/TiO <sub>2</sub> | 15                  | Batch        | 0.681                 | <i>0.1981</i> | 0.035  | <b>0.37</b>  | 1.74        | 0.42        | 1.37           | 1.20          | <b>3.89</b>                           |
| <b>KBL</b>        | CuO/TiO <sub>2</sub> | 30                  | Batch        | 0.189                 | <i>0.1051</i> | 0.025  | <b>0.19</b>  | 1.01        | 0.24        | 0.63           | 0.71          | <b>2.12</b>                           |
| <b>KBL</b>        | CuO/TiO <sub>2</sub> | 60                  | Batch        | 0.011                 | <i>0.0456</i> | 0.023  | <b>0.10</b>  |             |             |                |               |                                       |
| <b>KBL</b>        | no                   | 15                  | Batch        | 0.757                 | <i>0.1633</i> | 0.020  | <b>0.33</b>  | 1.24        | 0.50        | 1.22           | 1.20          | <b>3.61</b>                           |
| <b>KBL</b>        | no                   | 30                  | Batch        | 0.143                 | <i>0.0825</i> | 0.018  | <b>0.16</b>  | 0.94        | 0.33        | 0.49           | 0.77          | <b>2.05</b>                           |
| <b>KBL</b>        | CuO/TiO <sub>2</sub> | Contact time 8 min  | Fixed bed    | 0.828                 | 0.33          | 0.03   | <b>0.60</b>  | 3.37        | 1.47        | 2.21           | 3.27          | <b>10.05</b>                          |
| <b>KBL</b>        | CuO/TiO <sub>2</sub> | Contact time 6 min  | Fixed bed    | 1.89                  | 0.46          | 0.09   | <b>0.80</b>  | 4.20        | 1.48        | 11.62          | 3.77          | <b>17.74</b>                          |
| <b>KBL</b>        | CuO/TiO <sub>2</sub> | Contact time 4 min  | Fixed bed    | 4.61                  | 0.73          | 0.12   | <b>1.27</b>  | 3.91        | 1.55        | 11.35          | 3.75          | <b>17.66</b>                          |
